# Supplementary material
Source: publisher figshare collection journal article supplement (https://frontiersin.figshare.com/ndownloader/files/30806653)
Supplement: Supplementary file 1 [file 30806653]

## Sheet: Table 3 River Seds
Table 3. Modern Taiwan river sediment n-alkane d2H, sample elevation , and basin mean elevation
Sample	Latitdue	Longitude	Sample Elevation	Catchment Mean Elevation	d2HnC27	d2HnC29	d2HnC31	d2HnC27-31
OT-13-3	23.785	121.014	474	2151	-	-181.26	-174.505	-178.05
WT-11-12	121.049	23.158	778	1397	-166.991	-184.48	-174.362	-179.208
WT-11-10	121.018	23.185	782	2107	-167.668	-177.281	-175	-175.035
WH02	120.928	22.729	788	1516	-	-182.379	-169.511	-174.362
OT-14-09	120.9	22.714	1759	1956	-183	-183.137	-182.845	-182.924
WT-14-07A	120.883	22.731	1966	2029	-193.192	-184.853	-186.583	-186.658
OT-14-08	120.886	22.737	2013	2091	-166.083	-183.5	-176.21	-178
WT-11-4	121.024	23.327	2681	3005	-228.133	-220.195	-216.633	-220.287
WT-11-02	121.026	23.328	2693	2998	-216.531	-211.289	-207.03	-210.231
WT-11-03	121.025	23.327	2709	3039	-210.153	-216.277	-205.32	-206.829
WT-11-01	121.025	23.328	2709	3007	-209.577	-209.253	-207.396	-208.532
WT-11-07	121.03	23.286	3091	3228	-218.455	-214.324	-209.092	-212.822
WT-11-6	121.042	23.293	3136	3332	-217.434	-209.791	-209.341	-210.969
WT-11-05	121.054	23.293	3031	3201	-215.035	-207.466	-212.798	-213.773
19TW-LW16-Sedi	121.495	24.1819	443	1600	-198	-174	-165	-178.659
MT-TW-07c	24.069	120.781	224	390	-	-166	-164	-165.6																-150
